# Supplementary material
Source: PubMed Central journal article supplement (PMC8297444)
Supplement: NIHMS1720161-supplement-1720161_Supp_Data.pdf [file NIHMS1720161-supplement-1720161_Supp_Data.pdf]

1  
2  
3  
4  
5  
6  
7  
8  
9  
10  
11  
12  
13  
14  
15  
16  
17  
18  
19  
20  
21  
22  
23  
24  
25  
26  
27  
28  
29  
30  
31  
32  
33  
34

Supplementary Data

Cui et al.: Global miRNA dosage control of embryonic germ layer specification

35

36

37

38

39

40

41

42

43

44 This file contains Supplementary Figure 1 and Supplementary Tables 1-9.

45

46 Supplementary Figure 1:

47 The original source images of Western blot, Microprocessor assay.

48

49 Supplementary Table 1:

50 Global miRNA expression and P-value calculated by two-sided Student's t-test in WT  
51 mESCs and  $\Delta$ SL1 mESCs, corresponding to Fig. 2c and Extended Data Fig. 4d.

52

53 Supplementary Table 2:

54 Genes with expressional changes and P-value calculated by two-sided Student's t-test in  
55  $\Delta$ SL1 and DGCR8<sup>-/-</sup> ESCs compared with WT ESCs, corresponding to Figs. 2d, Extended  
56 Data Fig. 4e, 4f.

57

58 Supplementary Table 3:

59 Naive and primed genes expression in WT,  $\Delta$ SL1 and DGCR8<sup>-/-</sup> mESCs during EpiLC  
60 differentiation, corresponding to Extended Data Fig. 5a.

61

62 Supplementary Table 4:

63 Genes with expressional changes in  $\Delta$ SL1 compared with WT mESCs during EB and  
64 neural differentiation, corresponding to Extended Data Fig. 6b-6d.

65

66 Supplementary Table 5:

67 The expression of three germ layers marker genes in WT and  $\Delta$ SL1 mESCs during neural  
68 and EB differentiation, corresponding to Fig. 3b, Extended Data Fig. 6e.

69

70 Supplementary Table 6:  
71 Global miRNA expression during neural differentiation, corresponding to Extended Data  
72 Fig. 6f.

73  
74 Supplementary Table 7:  
75 The expression of lipid metabolic genes and three germ layer genes during EB  
76 differentiation treatment with lipid metabolic inhibitor GW9662, corresponding to Extended  
77 Data Figs. 8a, 8c, 8e.

78  
79 Supplementary Table 8:  
80 Global miRNA expression in human cell lines, corresponding to Fig.4c.

81  
82 Supplementary Table 9:  
83 List of primers and siRNA sequences used in the study.

84

85
