# Supplementary material
Source: PubMed Central journal article supplement (PMC8297444)

Related to Figure 1c

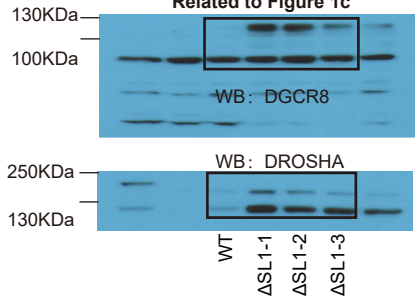

Related to Extended Data Figure 1f

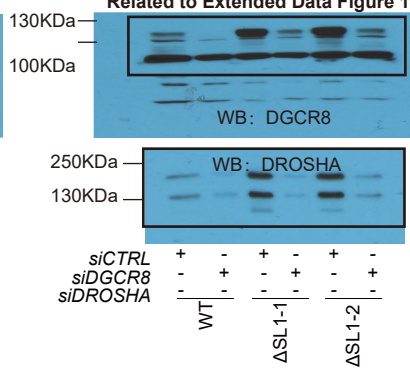

Related to Extended Data Figure 1f

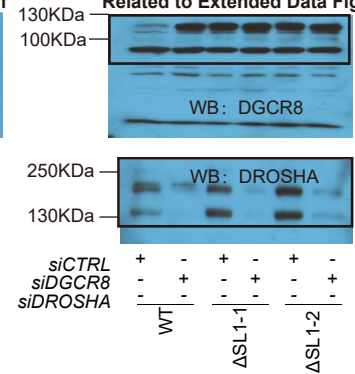

Related to Figure 2a

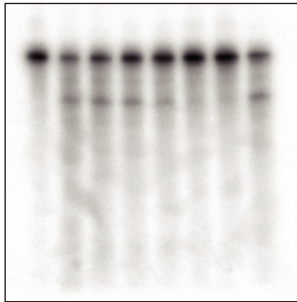

|   |     |     |     |     |     |     |     |              |
|---|-----|-----|-----|-----|-----|-----|-----|--------------|
| 0 | 60  | 60  | 60  | 60  | 120 | 180 | 180 | rDGCR8 (nM)  |
| 0 | 240 | 120 | 60  | 30  | 30  | 30  | 90  | rDROSHA (nM) |
|   | 2:8 | 2:4 | 2:2 | 2:1 | 4:1 | 6:1 | 6:3 |              |

Related to Figure 2b

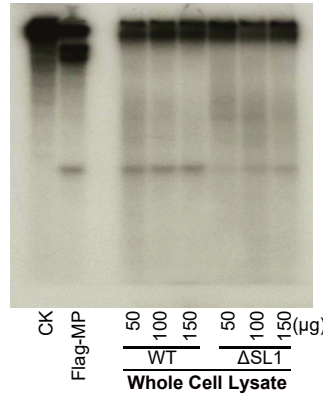

Related to Extended Data Figure 4a

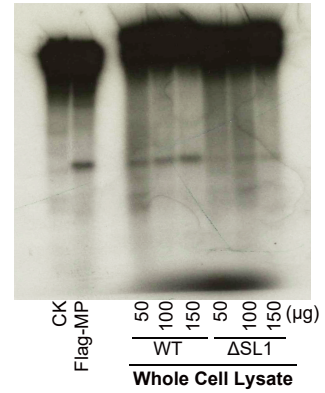

Related to Extended Data Figure 2b

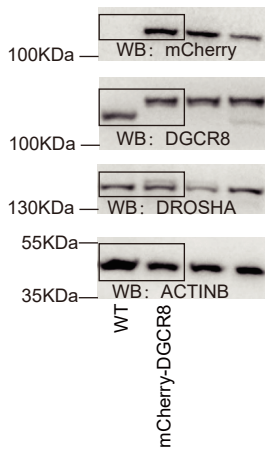

Related to Figure 4d

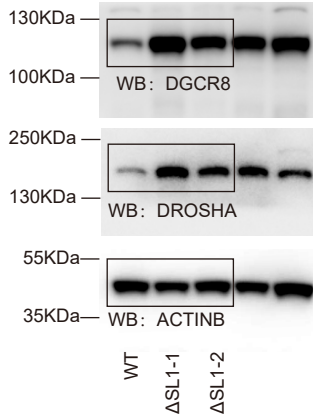

Related to Extended Data Figure 5f

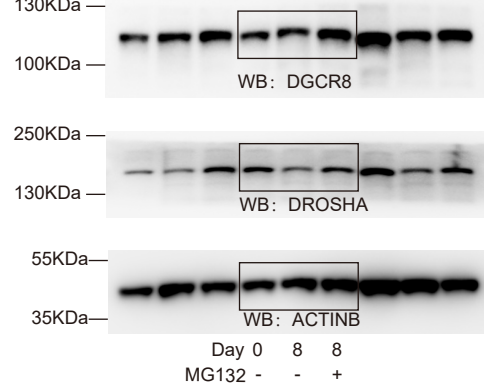

Related to Extended Data Figure 5e

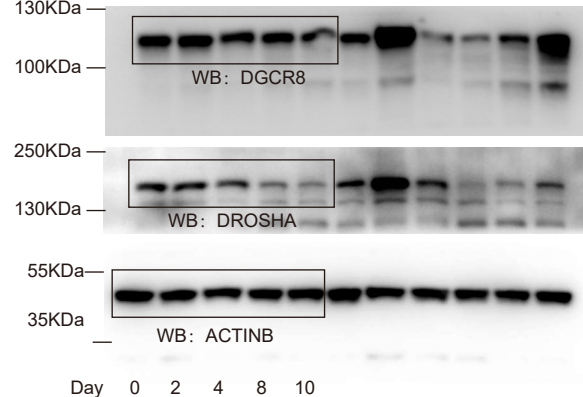

Supplement: NIHMS1720161-supplement-1720161_Supp_Fig1.pdf [file NIHMS1720161-supplement-1720161_Supp_Fig1.pdf]
